# Supplementary material for: Staff members’ prioritisation of care in residential aged care facilities: a Q methodology study
Source: PubMed Central journal article supplement (PMC7222492; doi:10.1186/s12913-020-05127-3), 2020-05-14
Supplement: 12913_2020_5127_MOESM2_ESM.pdf [file 12913_2020_5127_MOESM2_ESM.pdf]

Additional file 2: Q cards, care categories and factor arrays

| Card labels                          | Q card statements                                         | Care category                     | Factor arrays—card rankings <sup>a</sup> |           |           |           |
|--------------------------------------|-----------------------------------------------------------|-----------------------------------|------------------------------------------|-----------|-----------|-----------|
|                                      |                                                           |                                   | Factor 1                                 | Factor 2  | Factor 3  | Factor 4  |
| Assistance getting dressed           | Assistance getting dressed when needed                    | Activities of daily living        | -1*                                      | +1        | -3*       | 0         |
| Assistance with meals                | Assistance with meals when needed                         | Activities of daily living        | +1                                       | +4*       | 0         | +2*       |
| <b>Assistance with walking</b>       | <b>Assistance with walking when needed</b>                | <b>Activities of daily living</b> | <b>0</b>                                 | <b>+1</b> | <b>0</b>  | <b>+1</b> |
| Attitudes towards family             | The facility/home is welcoming to family members          | Psychosocial care                 | 0                                        | -2        | +1*       | -4*       |
| Bathing and showering                | Assistance with bathing/showering when needed             | Activities of daily living        | +2                                       | +3*       | -1*       | +1        |
| <b>Bowel care</b>                    | <b>Bowel care is provided when needed</b>                 | <b>Activities of daily living</b> | <b>+1</b>                                | <b>0</b>  | <b>0</b>  | <b>+1</b> |
| Call bell                            | Residents' call bells are responded to in a timely manner | Clinical care                     | +2                                       | 0         | +1        | 0         |
| <b>Choice about room environment</b> | <b>Residents have choice about what is in their room</b>  | <b>Independence and choice</b>    | <b>-4</b>                                | <b>-4</b> | <b>-2</b> | <b>-3</b> |

|                              |                                                           |                            |      |      |     |     |
|------------------------------|-----------------------------------------------------------|----------------------------|------|------|-----|-----|
| Clothing changed             | Residents' clothes are changed when needed                | Activities of daily living | -3   | 0    | -2  | -2  |
| Clothing choice              | Residents have choice about the clothes they wear         | Independence and choice    | -2   | -1*  | -4  | -3  |
| Conversations                | Time is taken to chat with residents                      | Psychosocial care          | -2   | -2   | +2  | +1  |
| Emotional support            | Emotional support is provided to residents                | Psychosocial care          | -1** | +1*  | +4* | +3* |
| Family information           | Family members are informed about residents' medical care | Clinical care              | +1   | -3** | +1  | +1  |
| Independence                 | Residents have independence                               | Independence and choice    | -1   | -1   | +2  | +2  |
| Meal choice                  | Residents have choice about their meals                   | Independence and choice    | -2   | 0*   | -2  | -2  |
| Medical condition management | Residents' medical conditions are managed                 | Clinical care              | +3   | -3   | +3  | +4  |
| Medication management        | Correct medication at the right time                      | Clinical care              | +4   | +2** | +1  | +3  |
| Mobility                     | Residents are supported to keep active and mobile         | Clinical care              | -1   | -1   | 0   | 0   |

|                                 |                                                                    |                                   |           |           |           |           |
|---------------------------------|--------------------------------------------------------------------|-----------------------------------|-----------|-----------|-----------|-----------|
| Monitoring/<br>Safety           | Residents are kept safe from injury or medical harm                | Clinical care                     | +4        | +2        | +2        | +4        |
| Nail care                       | Nail care is provided when needed                                  | Activities of daily living        | -3        | -1        | -3        | -4        |
| Nutrition                       | Residents' meals are nutritious                                    | Clinical care                     | +1        | +2        | -1        | -1        |
| Oral care                       | Regular dental and oral care is provided                           | Activities of daily living        | +0        | +4**      | -1        | -1        |
| Personal grooming               | Assistance with personal grooming when needed                      | Activities of daily living        | -1        | +2**      | -1        | -1        |
| Privacy                         | Residents' privacy is respected                                    | Respect                           | +2        | +3        | +3        | -1**      |
| <b>Repositioning</b>            | <b>Assistance with repositioning when needed</b>                   | <b>Activities of daily living</b> | <b>0</b>  | <b>0</b>  | <b>-1</b> | <b>0</b>  |
| <b>Resident decision-making</b> | <b>Residents are involved in making decisions about their care</b> | <b>Clinical care</b>              | <b>+1</b> | <b>0</b>  | <b>+2</b> | <b>0</b>  |
| Resident information            | Residents are informed about their medical care                    | Clinical care                     | +3**      | -4**      | 0         | -1        |
| <b>Respect</b>                  | <b>Residents are treated with respect</b>                          | <b>Respect</b>                    | <b>+2</b> | <b>+1</b> | <b>+4</b> | <b>+3</b> |
| Seating choice                  | Residents can choose where to sit                                  | Independence and choice           | -4        | -2        | -4        | -3        |

|                      |                                                                  |                            |      |     |      |     |
|----------------------|------------------------------------------------------------------|----------------------------|------|-----|------|-----|
|                      | during group activities                                          |                            |      |     |      |     |
| Skin care            | Skin care is provided when needed                                | Activities of daily living | 0    | +1  | -2   | -2  |
| Social activities    | Residents are offered a variety of social and leisure activities | Psychosocial care          | -2   | -2  | -3   | 0** |
| Spiritual activities | Opportunities for residents to engage in spiritual activities    | Psychosocial care          | -3   | -3  | +3** | -2  |
| Staff knowledge      | Staff are knowledgeable about residents' medical care            | Clinical care              | +3** | -1* | +1   | +2  |
| Toileting            | Assistance with toileting needs                                  | Activities of daily living | 0    | +3  | 0    | +2  |

<sup>a</sup>This column presents card rankings on the Q sort grid for each factor array. For example, 'Assistance with meals' was ranked at +4 for Factor/Viewpoint 2, signifying a high priority. Comparatively, this card was ranked at 0 for Factor/Viewpoint 3, suggesting that this is neither a high nor low priority.

\* Distinguishing statement at  $p < 0.05$

\*\* Distinguishing statement at  $p < 0.01$

Consensus statements at  $p > 0.05$  are bolded
