# Supplementary material for: Staff members’ prioritisation of care in residential aged care facilities: a Q methodology study
Source: PubMed Central journal article supplement (PMC7222492; doi:10.1186/s12913-020-05127-3), 2020-05-14
Supplement: 12913_2020_5127_MOESM3_ESM.pdf [file 12913_2020_5127_MOESM3_ESM.pdf]

**Additional file 3: Visual representation of the factor array for Factor 1**

|                               | -4 | -3                   | -2                | -1                         | 0                        | +1                       | +2                    | +3                           | +4                    |
|-------------------------------|----|----------------------|-------------------|----------------------------|--------------------------|--------------------------|-----------------------|------------------------------|-----------------------|
| Seating choice                |    | Clothing changed     | Conversations     | Mobility                   | Repositioning            | Family information       | Call bell             | Medical condition management | Monitoring/Safety     |
| Choice about room environment |    | Nail care            | Social activities | Personal grooming          | Oral care                | Resident decision-making | Bathing and Showering | Staff knowledge              | Medication management |
|                               |    | Spiritual activities | Meal choice       | Assistance getting dressed | Skin care                | Nutrition                | Respect               | Resident information         |                       |
|                               |    |                      | Clothing choice   | Emotional support          | Assistance with walking  | Bowel care               | Privacy               |                              |                       |
|                               |    |                      |                   | Independence               | Toileting                | Assistance with meals    |                       |                              |                       |
|                               |    |                      |                   |                            | Attitudes towards family |                          |                       |                              |                       |

| Legend                                                                              |                            |
|-------------------------------------------------------------------------------------|----------------------------|
|   | Respect                    |
|  | Clinical care              |
|  | Activities of daily living |
|  | Psychosocial care          |
|  | Independence and choice    |
