# Supplementary material for: Staff members’ prioritisation of care in residential aged care facilities: a Q methodology study
Source: PubMed Central journal article supplement (PMC7222492; doi:10.1186/s12913-020-05127-3), 2020-05-14
Supplement: 12913_2020_5127_MOESM4_ESM.pdf [file 12913_2020_5127_MOESM4_ESM.pdf]

**Additional file 4: Visual representation of the factor array for Factor 2**

| -4                            | -3                           | -2                       | -1              | 0                        | +1                         | +2                    | +3                    | +4                    |
|-------------------------------|------------------------------|--------------------------|-----------------|--------------------------|----------------------------|-----------------------|-----------------------|-----------------------|
| Resident information          | Medical condition management | Conversations            | Staff knowledge | Resident decision-making | Assistance with walking    | Monitoring/ Safety    | Bathing and Showering | Oral care             |
| Choice about room environment | Family information           | Social activities        | Mobility        | Call bell                | Assistance getting dressed | Medication management | Toileting             | Assistance with meals |
|                               | Spiritual activities         | Attitudes towards family | Nail care       | Clothing changed         | Skin care                  | Nutrition             | Privacy               |                       |
|                               |                              | Seating choice           | Independence    | Repositioning            | Respect                    | Personal grooming     |                       |                       |
|                               |                              |                          | Clothing choice | Bowel care               | Emotional support          |                       |                       |                       |
|                               |                              |                          |                 | Meal choice              |                            |                       |                       |                       |

| Legend                                                                                                                 |                            |
|------------------------------------------------------------------------------------------------------------------------|----------------------------|
| <span style="display:inline-block; width:15px; height:15px; background-color:#c8e6c9; border:1px solid black;"></span> | Respect                    |
| <span style="display:inline-block; width:15px; height:15px; background-color:#e1bee7; border:1px solid black;"></span> | Clinical care              |
| <span style="display:inline-block; width:15px; height:15px; background-color:#bbdefb; border:1px solid black;"></span> | Activities of daily living |
| <span style="display:inline-block; width:15px; height:15px; background-color:#ffe0b2; border:1px solid black;"></span> | Psychosocial care          |
| <span style="display:inline-block; width:15px; height:15px; background-color:#fff9c4; border:1px solid black;"></span> | Independence and choice    |
