# Supplementary material for: Staff members’ prioritisation of care in residential aged care facilities: a Q methodology study
Source: PubMed Central journal article supplement (PMC7222492; doi:10.1186/s12913-020-05127-3), 2020-05-14

**Additional file 5: Visual representation of the factor array for Factor 3**

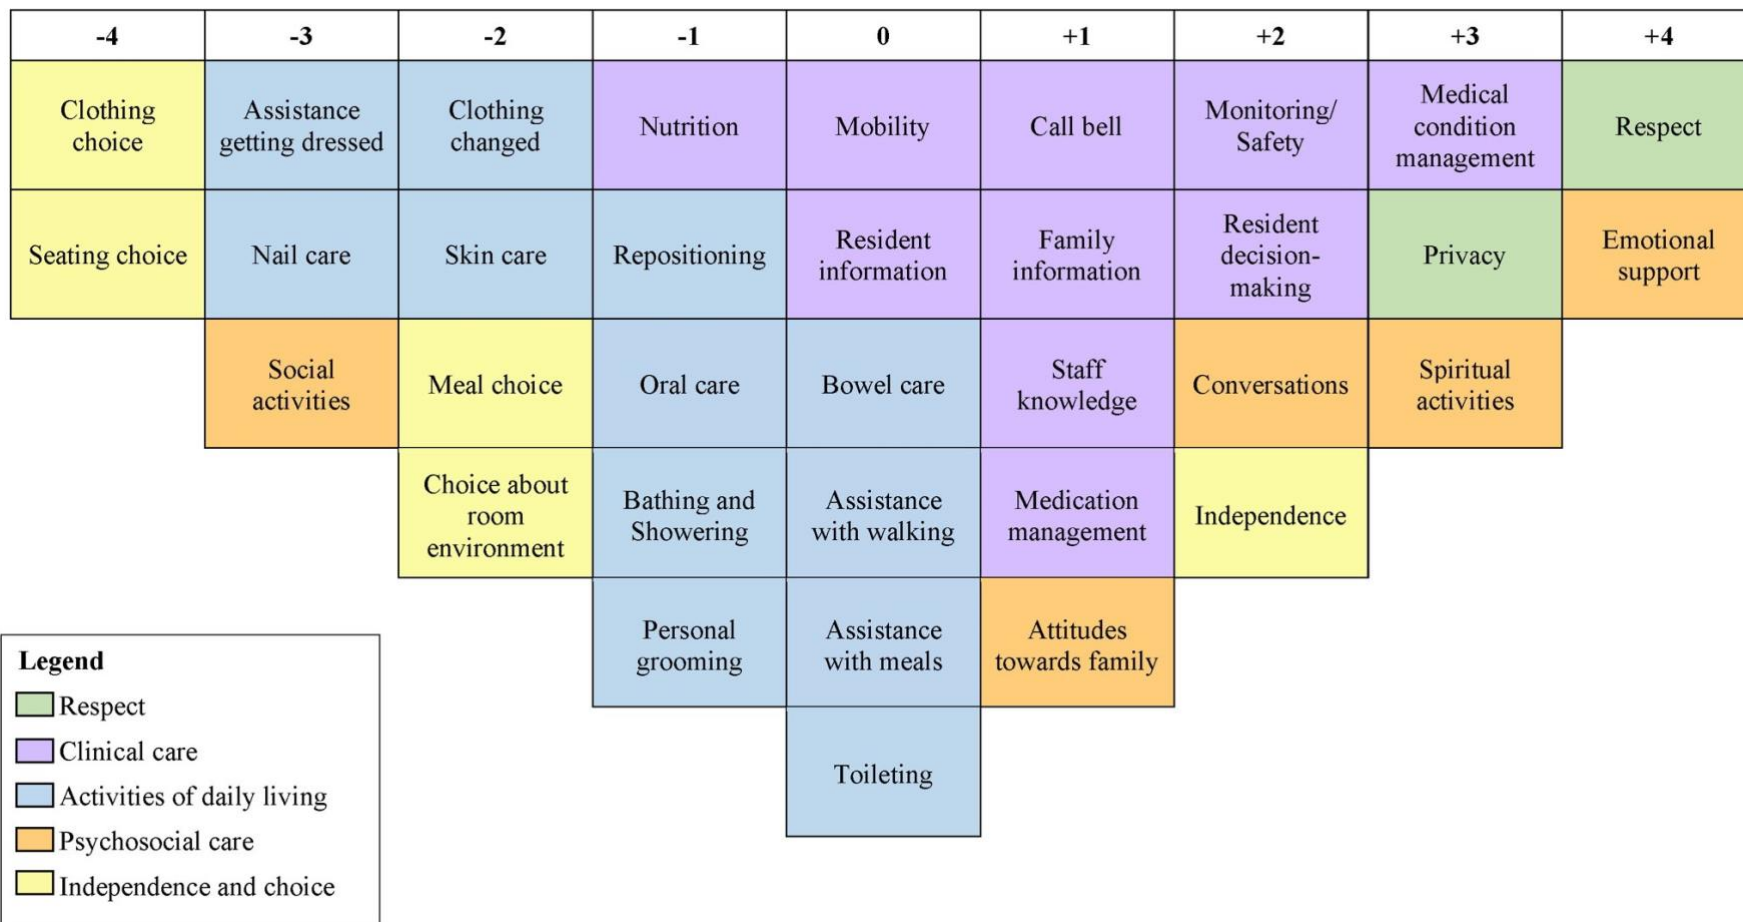

Supplement: 12913_2020_5127_MOESM5_ESM.pdf [file 12913_2020_5127_MOESM5_ESM.pdf]
