# Supplementary material for: Staff members’ prioritisation of care in residential aged care facilities: a Q methodology study
Source: PubMed Central journal article supplement (PMC7222492; doi:10.1186/s12913-020-05127-3), 2020-05-14
Supplement: 12913_2020_5127_MOESM6_ESM.pdf [file 12913_2020_5127_MOESM6_ESM.pdf]

**Additional file 6: Visual representation of the factor array for Factor 4.**

|                          | -4 | -3                            | -2                   | -1                   | 0                          | +1                      | +2                    | +3                    | +4                           |
|--------------------------|----|-------------------------------|----------------------|----------------------|----------------------------|-------------------------|-----------------------|-----------------------|------------------------------|
| Nail care                |    | Choice about room environment | Clothing changed     | Resident information | Resident decision-making   | Family information      | Staff knowledge       | Medication management | Monitoring/ Safety           |
| Attitudes towards family |    | Seating choice                | Skin care            | Nutrition            | Mobility                   | Bowel care              | Assistance with meals | Respect               | Medical condition management |
|                          |    | Clothing choice               | Spiritual activities | Oral care            | Call bell                  | Assistance with walking | Toileting             | Emotional support     |                              |
|                          |    |                               | Meal choice          | Personal grooming    | Assistance getting dressed | Bathing and Showering   | Independence          |                       |                              |
|                          |    |                               |                      | Privacy              | Repositioning              | Conversations           |                       |                       |                              |
|                          |    |                               |                      |                      | Social activities          |                         |                       |                       |                              |

  

**Legend**

- Respect
- Clinical care
- Activities of daily living
- Psychosocial care
- Independence and choice
